# Supplementary material for: EvolvingSTEM: a microbial evolution-in-action curriculum that enhances learning of evolutionary biology and biotechnology
Source: PubMed Central journal article supplement (PMC7328067; doi:10.1186/s12052-019-0103-4), 2019-04-24
Supplement: 12052_2019_103_MOESM1_ESM.pdf [file 12052_2019_103_MOESM1_ESM.pdf]

## **Supplemental Files**

**Sup. 1: Materials Needed and Media Recipes**

**Sup. 2: EvolvingSTEM Experimental Protocol**

**Sup. 3: Curriculum Overview**

**Sup. 4: Pre and Post Lab Questions**

**Sup. 5: Student Test and Grading Rubric**

## **S1. Materials Needed per Classroom**

### **Materials for entire classroom**

- Gloves (will need at least 6 pairs per student)
- Spray bottle of 70% Ethanol (to clean benchtop)
- Spray bottle of 10% Bleach (to decontaminate bacterial cultures and plates)
- Orbital shaker
- Incubator
- Serological pipettes and Pipette aid (to prefill tubes with media and PBS)
- *Pseudomonas fluorescens* SBW25 colonies streaked on ½ Tsoy-Agar plates (need to have 4 distinct colonies for each student group)
- Autoclave (to sterilize reusable materials and media)
- Dissecting microscope (not required, but helpful to visualize colonies)

### **Materials for each student group**

- Bunsen burner
- Vortex
- Micropipettes and tips: p200 and p1000
- Forceps: 1 pair
- Metal inoculation loop: 1
- Glass spreader beads
- Glass culture tubes (15mL): 36
- Small glass tubes (5mL): 8
- 5 and 15 mL tube racks
- White beads: 9
- Black beads: 3
- Queen's B Media: 82mL
- PBS: 102mL
- Tsoy-agar plates: 12

## **Media Recipes**

### **1L Queen's B Media**

- 20g Proteose Peptone No. 3
- 1.5g  $K_2HPO_4$  (Potassium Phosphate Dibasic)
- 25mL Glycerol
- 970mL Water

1. Autoclave for 45 minutes
2. Allow to cool to room temperature
3. Add 6mL of 1M  $MgSO_4$  (Magnesium Sulfate) stock

### **250mL 1M $MgSO_4$ Stock**

- 30g  $MgSO_4$  (anhydrous)  
*or*
- 61.6g  $MgSO_4$  (heptahydrate)
- 250mL Water

1. Combine salts and water
2. Autoclave for 30-45 minutes

### **1L PBS**

- 7.65g NaCl
- 0.72g  $Na_2HPO_4$  (Sodium Phosphate Dibasic, anhydrous)
- 0.21g  $KH_2PO_4$  (Potassium Phosphate Monobasic)
- 1L Water

1. Combine salts and water
2. Autoclave for 45 minutes

### **1L ½ Strength Tsoy-Agar (makes approximately 50 Plates)**

- 15g Tsoy
- 15g Agar
- 1L Water

1. Autoclave for 45 minutes
2. Pour plates while still hot (so agar does not harden)
3. Allow to solidify overnight before using
